# Supplementary material for: Ethyl Linoleate Derivatives from Olefin Metathesis as a Function of the Starting Complex and Reactivity Conditions
Source: Preprints.org preprint supplement (doi:10.20944/preprints201704.0032.v1), 2017-04-05
Supplement: Supplementary file 1 [file supplementary]

Ethyl linoleate derivatives from olefin metathesis as a function of the starting complex and reactivity conditions

Cristina Vidal da S. Neta1, Yan F. Silva2, Valdemiro P. Carvalho Jr2, Benedito dos S. Lima-Neto3 and José Luiz S. Sá1,*

1 Centro de Ciências da Natureza, Universidade Estadual do Piauí, 64002-150, Teresina, PI, Brazil.

2 Faculdade de Ciências e Tecnologia, Universidade Estadual Paulista, CEP 19060-900, Presidente Prudente, SP, Brazil.

3 Instituto de Química de São Carlos, Universidade de São Paulo, PO Box 780, 13560-970, São Carlos, SP, Brazil.

***** Correspondence: zeluizquimica@gmail.com; Tel.: +55-086-99922-1554

***** Correspondence: benedito@iqsc.usp.br; Tel.: +55-016-3373-9333

**Figure S1**. GC-MS chromatogram of a fresh sample of pure substrate.

**Figure S2.** Cyclic voltammograms of NL in the absence (solid line) and presence (dash line) of SnCl2 in CH2Cl2 at 25 °C; [Ru] = 10 mM, [Bu4NPF6] = 0.1 M in CHCl3,[Ru]/[Sn] = 1:1; scan rate = 100 mV s−1.
